# Supplementary material for: Genomic and Ecogenomic Characterization of Proteus mirabilis Bacteriophages
Source: Front Microbiol. 2019 Aug 6;10:1783. doi: 10.3389/fmicb.2019.01783 (PMC6691071; doi:10.3389/fmicb.2019.01783)
Supplement: Supplementary file 2 [file Table_1.xlsx]

## Sheet: RS1pmA,RS1pmB,RS3pmA
Supplementary Data S1
(1) - Broad functional categories assigend based on predicted function of ORFS in BlastP and CD searches (See (2)). Relates to ORF categories on Fig 2, FigS2, FigS3, Table S3
(2) - Predictied ORF function/product based on Blastp and conserved domain searches. Valid hits considered to be: BlastP: minimum 20% identity, 1e-5 or lower; CD: 1e-2 or lower. Accession numbers relate to BlastP top hits.
(3) - Affiliation to other phage genomes based on best hits (by bitscore) from tBlastn on searches of phage nuclotide genome sequences using translated ORF aa equences. Valid hits considered to be: min 35% identity, over ≥25 amino acids, 1e-5 or lower
ORF	(1) Functional category	(2) putative function (Based on Nr BlastP/CD)	(3) Phage best hit (tBlastn)	Phage best hit identity
ORF1	Unknown	no hits
ORF2	Unknown	no hits	Proteus phage PM16	0.821
ORF3	Lysis	Esterase /Lipase gb_AIW03084	Proteus phage PM75	1
ORF4	Unknown phage related	Unknown phage related gb_AGZ17247	Proteus phage PM75	0.99
ORF5	Unknown phage related	Unknown phage related gb_AGZ17248	Proteus phage PM16	0.977
ORF6	Unknown phage related	Unknown phage related gb_AGZ17249	Proteus phage PM75	0.936
ORF7	Unknown phage related	Unknown phage related gb_AGZ17250	Proteus phage PM16	0.851
ORF8	Unknown	no hits
ORF9	Unknown phage related	Unknown phage related emb_CCI88402	Proteus phage PM75	0.803
ORF10	Unknown phage related	Unknown phage related gb_AGZ17253	Proteus phage PM75	0.741
ORF11	Unknown phage related	Unknown phage related gb_AGZ17254	Proteus phage PM16	0.569
ORF12	Unknown phage related	Unknown phage related gb_AGZ17255	Proteus phage PM75	1
ORF13	Unknown phage related	Unknown phage related gb_AGZ17256	Proteus phage PM16	1
ORF14	Replication and regulation	DNA Primase gb_AIW03087	Proteus phage PM75	0.995
ORF15	Unknown	no hits	Proteus phage PM16	0.995
ORF16	Replication and regulation	DNA helicase gb_AIW03088	Proteus phage PM75	0.994
ORF17	Replication and regulation	DNA Polymerase gb_AGZ17260	Proteus phage PM16	0.993
ORF18	Unknown phage related	Unknown phage related gb_AGZ17262	Proteus phage PM75	0.992
ORF19	Replication and regulation	Nucleotide/nucleoside kinase gb_AIW03091	Proteus phage PM75	0.992
ORF20	Unknown phage related	Unknown phage related gb_AGZ17264	Proteus phage PM75	0.992
ORF21	Unknown phage related	Unknown phage related gb_AGZ17265	Proteus phage PM16	0.991
ORF22	Unknown phage related	Unknown phage related gb_AGZ17266	Proteus phage PM75	0.99
ORF23	Unknown	no hits
ORF24	Unknown phage related	Unknown phage related gb_AGZ172667	Proteus phage PM75	0.986
ORF25	Replication and regulation	exonuclease gb_AGZ172668	Proteus phage PM75	0.986
ORF26	Unknown	no hits	Proteus phage PM75	0.985
ORF27	Replication and regulation	Recombination endonuclease gb_AIW03094	Proteus phage PM16	0.985
ORF28	Unknown	no hits	Proteus phage PM16	0.984
ORF29	Unknown phage related	Unknown phage related gb_AGZ17270	Proteus phage PM16	0.984
ORF30	Unknown	no hits	Proteus phage PM75	0.984
ORF31	Replication and regulation	DNA dependant RNA polymerase gb_AIW03095	Proteus phage PM16	0.983
ORF32	Unknown phage related	Unknown phage related gb_AGZ17272	Proteus phage PM75	0.974
ORF33	Structure and packaging	Virion Protein gb_AGZ17273	Proteus phage PM75	0.973
ORF34	Structure and packaging	Tail connector protein gb_AGZ17274	Proteus phage PM75	0.971
ORF35	Structure and packaging	Scaffolding protein gb_AGZ17272	Proteus phage PM16	0.957
ORF36	Structure and packaging	Capsid protein gb_AGZ17276	Proteus phage PM16	0.949
ORF37	Structure and packaging	Virion Protein gb_ALG64161	Proteus phage PM16	0.949
ORF38	Unknown	no hits
ORF39	Structure and packaging	Tail protien gb_AIW03099	Proteus phage PM16	0.945
ORF40	Unknown	no hits
ORF41	Structure and packaging	Tail protien gb_AGZ17278	Proteus phage PM16	0.944
ORF42	Structure and packaging	Internal virion protein gb_AGZ17279	Proteus phage PM16	0.933
ORF43	Replication and regulation	polynucleotide kinase gb_AIW03102	Proteus phage PM75	0.929
ORF44	Structure and packaging	Internal virion protien gb_AGZ17281	Proteus phage PM16	0.928
ORF45	Structure and packaging	Tail fibre protien gb_AIW03104	Proteus phage PM16	0.926
ORF46	Replication and regulation	DNA maturase A gb_AGZ17283	Proteus phage PM75	0.922
ORF47	Replication and regulation	DNA maturase B gb_AIW03105	Proteus phage PM16	0.92
ORF48	Structure and packaging	Virion Protein gb_AGZ17285	Proteus phage PM75	0.892
ORF49	Unknown phage related	Unknown phage related gb_AGZ17286	Proteus phage PM75	0.882
ORF50	Unknown phage related	Unknown phage related gb_AGZ17287	Proteus phage PM75	0.855
ORF51	Lysis	Endolysin gb_AIW03107	Proteus phage PM75	0.852
ORF52	Structure and packaging	Tail protein gb_KGA90494	Proteus phage PM16	0.837
ORF53	Unknown	no hits	Proteus phage PM16	0.831

## Sheet: RS8pmA
Supplementary Data S1
(1) - Broad functional categories assigend based on predicted function of ORFS in BlastP and CD searches (See (2)). Relates to ORF categories on Fig 2, FigS2, FigS3, Table S3
(2) - Predictied ORF function/product based on Blastp and conserved domain searches. Valid hits considered to be: BlastP: minimum 20% identity, 1e-5 or lower; CD: 1e-2 or lower. Accession numbers relate to BlastP top hits.
(3) - Affiliation to other phage genomes based on best hits (by bitscore) from tBlastn on searches of phage nuclotide genome sequences using translated ORF aa equences. Valid hits considered to be: min 35% identity, over ≥25 amino acids, 1e-5 or lower
ORF	(1) Functional category	(2) putative function (Based on Nr BlastP/CD)	(3) Phage best hit	Phage best hit identity
ORF1	Unknown	no hits
ORF2	Unknown	Unknown	Proteus phage PM75	0.936
ORF3	Unknown	Unknown	Proteus phage PM16	0.936
ORF4	Unknown phage related	Unknown phage related emb_CEO90682	Proteus phage PM16	0.94
ORF5	Lysis	Lipase/esterase gb_AIW03084	Proteus phage PM75	0.945
ORF6	Unknown phage related	Phosphonoacetylaldehyde hydrolase gb_AGZ17247	Proteus phage PM75	0.946
ORF7	Unknown phage related	Unknown phage related gb_AGZ17249	Proteus phage PM75	0.946
ORF8	Unknown phage related	Unknown phage related gb_AGZ17250	Proteus phage PM16	0.947
ORF9	Unknown phage related	Unknown phage related gb_AGZ17251	Proteus phage PM75	0.958
ORF10	Unknown	no hits
ORF11	Unknown phage related	Unknown phage related emb_CCI88402	Proteus phage PM16	0.959
ORF12	Unknown phage related	Unknown phage related gb_AGZ17253	Proteus phage PM16	0.959
ORF13	Unknown phage related	Unknown phage related (Putative choline kinase) gb_AGZ17254	Proteus phage PM75	0.965
ORF14	Unknown phage related	Unknown phage related gb_AGZ17255	Proteus phage PM75	0.966
ORF15	Unknown phage related	Unknown phage related gb_AGZ17256	Proteus phage PM16	0.972
ORF16	Replication and regulation	DNA Primase gb_AIW03087	Proteus phage PM16	0.974
ORF17	Replication and regulation	DNA Helicase gb_AGZ17258	Proteus phage PM16	0.974
ORF18	Unknown	Unknown
ORF19	Replication and regulation	DNA polymerase gb_AIW03089	Proteus phage PM16	0.975
ORF20	Unknown phage related	Unknown phage related gb_AGZ17262	Proteus phage PM16	0.978
ORF21	Replication and regulation	Nucleotide/nucleoside kinase gb_AIW03091	Proteus phage PM75	0.98
ORF22	Unknown phage related	Unknown phage related gb_AGZ17264	Proteus phage PM16	0.982
ORF23	Unknown phage related	Unknown phage related gb_AGZ17265	Proteus phage PM75	0.984
ORF24	Unknown phage related	Unknown phage related gb_AGZ17266	Proteus phage PM16	0.985
ORF25	Unknown phage related	Unknown phage related gb_AGZ17267	Proteus phage PM16	0.989
ORF26	Unknown	no hits
ORF27	Replication and regulation	exonuclease gb_AIW03093	Proteus phage PM75	0.992
ORF28	Unknown	no hits	Proteus phage PM16	0.995
ORF29	Unknown	no hits	Proteus phage PM75	0.995
ORF30	Replication and regulation	Recombination endonuclease gb_AGZ17269	Proteus phage PM16	0.996
ORF31	Unknown	no hits	Proteus phage PM16	0.997
ORF32	Unknown phage related	Unknown phage related gb_AGZ17270	Proteus phage PM75	0.998
ORF33	Unknown	no hits	Proteus phage PM75	1
ORF34	Replication and regulation	DNA dependant RNA polymerase gb_AIW03095	Proteus phage PM16	1
ORF35	Unknown phage related	Unknown phage related gb_AGZ17272	Proteus phage PM75	1
ORF36	Structure and packaging	Virion Protein gb_AGZ17273
ORF37	Structure and packaging	Tail connector protein gb_AGZ17274	Proteus phage PM93	0.479
ORF38	Structure and packaging	Scaffolding protein gb_AIW03097	Proteus phage PM75	0.555
ORF39	Structure and packaging	Capsid protein gb_AIW03098_1	Proteus phage PM16	0.712
ORF40	Structure and packaging	Virion Protein gb_ALG64161	Proteus phage PM75	0.879
ORF41	Unknown	no hits
ORF42	Structure and packaging	Tail associated protein gb_AGZ17278	Proteus phage PM75	0.972
ORF43	Structure and packaging	Tail associated protein gb_AGZ17278	Proteus phage PM16	0.991
ORF44	Structure and packaging	Internal virion protein gb_AGZ17279	Proteus phage PM16	1
ORF45	Replication and regulation	Polynucleotide kinase gb_AIW03102	Proteus phage PM75	0.994
ORF46	Structure and packaging	Internal core Protein gb_AIW03103	Proteus phage PM16	0.789
ORF47	Structure and packaging	Tail fiber Protein gb_AIW03104	Proteus phage PM16	0.796
ORF48	Replication and regulation	DNA Maturase A gb_AGZ17283	Proteus phage PM16	0.851
ORF49	Replication and regulation	DNA Maturase B gb_AIW03105	Proteus phage PM75	0.864
ORF50	Structure and packaging	Virion Protein gb_AGZ17285	Proteus phage PM16	0.899
ORF51	Unknown phage related	Unknown phage related gb_AGZ17286	Proteus phage PM16	0.907
ORF52	Unknown phage related	Unknown phage related gb_AGZ17287	Proteus phage PM75	0.917
ORF53	Lysis	Endolysin gb_AGZ17288	Proteus phage PM75	0.926
ORF54	Structure and packaging	Virion Protein gb_AIW03156	Proteus phage PM16	0.931

## Sheet: RS51pmB
Supplementary Data S1
(1) - Broad functional categories assigend based on predicted function of ORFS in BlastP and CD searches (See (2)). Relates to ORF categories on Fig 2, FigS2, FigS3, Table S3
(2) - Predictied ORF function/product based on Blastp and conserved domain searches. Valid hits considered to be: BlastP: minimum 20% identity, 1e-5 or lower; CD: 1e-2 or lower. Accession numbers relate to BlastP top hits.
(3) - Affiliation to other phage genomes based on best hits (by bitscore) from tBlastn on searches of phage nuclotide genome sequences using translated ORF aa equences. Valid hits considered to be: min 35% identity, over ≥25 amino acids, 1e-5 or lower
ORF	(1) Functional category	(2) putative function (Based on Nr BlastP/CD)	(3) Phage best hit	Phage best hit identity
ORF1	Unknown phage related	Unknown phage related emb_CDG96658	Burkholderia phage BcepNY3	0.394
ORF2	Structure and packaging	Baseplate J-like protein WP_038216876	Salmonella phage ST64T	0.376
ORF3	Structure and packaging	Tail fiber like protein mb_CAQ85182	Actinobacillus phage Aaphi23	0.375
ORF4	Structure and packaging	Carbohydrate binding/glycoside hydrolase WP_046024300	Actinobacillus phage Aaphi23	0.359
ORF5	Structure and packaging	Tail fiber assembly emb_CDL86732	Actinobacillus phage Aaphi23	0.35
ORF6	Replication and regulation	DNA nuclease gb_AIM40814
ORF7	Replication and regulation	DNA helicase gb_AKA61239
ORF8	Unknown	no hits
ORF9	Unknown phage related	Unknown phage related gb_AAW67542
ORF10	Replication and regulation	NTPase gb_AIM40819
ORF11	Unknown	no hits
ORF12	Unknown phage related	Unknown phage related gb_ADU79175
ORF13	Replication and regulation	Cro familiy transcriptional regulator gb_ALQ62872
ORF14	Replication and regulation	Primase gb_AIM40821
ORF15	Unknown	no hits
ORF16	Unknown	Unknown
ORF17	Unknown	no hits
ORF18	Replication and regulation	Methyltransferase/methylase emb_CFQ74339
ORF19	Unknown	unknown
ORF20	Unknown	no hits
ORF21	Unknown	no hits
ORF22	Unknown	no hits
ORF23	Unknown	Putative C02 fixation protien
ORF24	Unknown	no hits
ORF25	Unknown	no hits
ORF26	Unknown	no hits
ORF27	Replication and regulation	Phosphoadenosine phosphosulfate phaophatase
ORF28	Unknown	no hits
ORF29	Unknown	no hits
ORF30	Unknown	unknown
ORF31	Unknown	no hits
ORF32	Unknown	no hits
ORF33	Unknown	no hits
ORF34	Unknown	no hits
ORF35	Unknown	no hits
ORF36	Unknown	no hits
ORF37	Unknown	Unknown
ORF38	Unknown	no hits
ORF39	Unknown	Unknown
ORF40	Unknown	no hits
ORF41	Unknown	no hits
ORF42	Unknown	no hits
ORF43	Lysis	Holin
ORF44	Structure and packaging	Structural protein
ORF45	Unknown	no hits
ORF46	Lysis	Cell lysis protien(related to R-Rz1 endolysin complex) YP_002411639
ORF47	Unknown	no hits
ORF48	Lysis	Proteosome beta subunit NtN hydrolase type protien gb_AEP83834	Aggregatibacter phage S1249	0.396
ORF49	Unknown	no hits
ORF50	Unknown	Unknown
ORF51	Structure and packaging	Large subunit terminase CDH07538_1
ORF52	Unknown	no hits
ORF53	Unknown	no hits
ORF54	Unknown	Unknown
ORF55	Unknown phage related	Unknown phage related WP_041380127	Salmonella phage E1	0.719
ORF56	Unknown	no hits
ORF57	Unknown	Unknown
ORF58	Structure and packaging	Head morphogenesis WP_036963099	Hamiltonia phage APSE-2	0.581
ORF59	Unknown	no hits
ORF60	Unknown	no hits
ORF61	Unknown	no hits
ORF62	Unknown phage related	Unknown phage related WP_046335960	Aggregatibacter phage S1249	0.575
ORF63	Unknown phage related	Unknown phage related WP_04633595	Mycobacterium phage Boomer	0.559
ORF64	Structure and packaging	Capsid protein WP_021571199	Vibrio phage PyD21-A	0.54
ORF65	Structure and packaging	Tail protein gb_AIM50965	Actinobacillus phage Aaphi23	0.5
ORF66	Unknown	Unknown
ORF67	Unknown	Unknown	Klebsiella phage phiKO2	0.49
ORF68	Unknown	no hits
ORF69	Unknown	Unknown	Vibrio phage PyD21-A	0.472
ORF70	Replication and regulation	methyltransferase gb_KGA59375	Escherichia phage HK97	0.463
ORF71	Unknown phage related	Unknown plasmid/phage related WP_016257032	Actinobacillus phage Aaphi23	0.45
ORF72	Unknown phage related	Unknown phage related NP_852764	Pseudoalteromonas phage PM2	0.434
ORF73	Unknown	Unknown	Listonella phage phiHSIC	0.432
ORF74	Unknown phage related	Unknown plasmid/phage related WP_016257034	Actinobacillus phage Aaphi23	0.431
ORF75	Unknown phage related	Unknown plasmid/phage related WP_016257035
ORF76	Unknown	no hits
ORF77	Structure and packaging	Tail protein WP_052116574	Aggregatibacter phage S1249	0.425
ORF78	Unknown	Unknown	Iodobacteriophage phage phiPLPE	0.413
ORF79	Unknown	Unknown
ORF80	Replication and regulation	RNA nuclease like protein WP_036409904	Actinobacillus phage Aaphi23	0.41
ORF81	Unknown	Unknown	Actinobacillus phage Aaphi23	0.399
ORF82	Unknown	Unknown
ORF83	Unknown	no hits
